# Supplementary material for: Bis(alkyl) rare-earth complexes supported by a new tridentate amidinate ligand with a pendant diphenylphosphine oxide group. Synthesis, structures and catalytic activity in isoprene polymerization
Source: Royal Society of Chemistry journal article supplement (doi:10.1039/c5dt02570b), 2015-01-01
Supplement: c5dt02570b1.pdf [file c5dt02570b1.pdf]

## Electronic supplementary material

### Bis(alkyl) rare-earth complexes supported by new tridentate amidinate ligand with a pendant diphenylphosphine oxide group.

#### Synthesis, structures and catalytic activity in isoprene polymerization

Aleksei O. Tolpygin,<sup>a</sup> Tatyana A. Glukhova,<sup>a</sup> Anton V. Cherkasov,<sup>a</sup> Georgy K. Fukin,<sup>a</sup> Diana V. Aleksanyan,<sup>b</sup> Dongmei Cui,<sup>c</sup> Alexander A. Trifonov<sup>a,b,\*</sup>

<sup>a</sup>*Institute of Organometallic Chemistry of Russian Academy of Sciences, Tropinina 49, GSP-445, 630950, Nizhny Novgorod (Russia) Fax: 007831 4627497; Tel: 007831 4623532; E-mail: [trif@iomc.ras.ru](mailto:trif@iomc.ras.ru)*

<sup>b</sup>*Institute of Organoelement compounds of Russian Academy of Sciences, Vavilova str. 28, 119334, Moscow (Russia)*

<sup>c</sup>*State Key Laboratory of Polymer Physics and Chemistry, Changchun Institute of Applied Chemistry, Chinese Academy of Sciences, 5625 Renmin street, Changchun 130022 (China)*

**Table 1S.** Crystallographic data and structure refinement details for **1**, **2**, **4** and **5**.

**Table 2S.** Catalytic tests in isoprene polymerization initiated by systems (**3-5**)/borate/ $\text{AlMe}_3$  (borate:  $[\text{Et}_3\text{NH}][\text{BPh}_4]$ ,  $\text{B}(\text{C}_6\text{F}_5)_3$ ,  $[\text{Ph}_3\text{C}][\text{B}(\text{C}_6\text{F}_5)_4]$ ,  $[\text{PhNHMe}_2][\text{B}(\text{C}_6\text{F}_5)_4]$ ,  $[\text{Ln}]/[\text{borate}]/[\text{AlMe}_3]=1:1:10$ ).

**Figure 1S.**  $^1\text{H}$  NMR spectrum of  $2\text{-}[\text{Ph}_2\text{P}(\text{O})]\text{C}_6\text{H}_4\text{NHC}(t\text{Bu})=\text{N}(2,6\text{-Me}_2\text{C}_6\text{H}_3)$  (**1**).

**Figure 2S.**  $^{13}\text{C}$  NMR spectrum of  $2\text{-}[\text{Ph}_2\text{P}(\text{O})]\text{C}_6\text{H}_4\text{NHC}(t\text{Bu})=\text{N}(2,6\text{-Me}_2\text{C}_6\text{H}_3)$  (**1**).

**Figure 3S.**  $^{31}\text{P}$  NMR spectrum of  $2\text{-}[\text{Ph}_2\text{P}(\text{O})]\text{C}_6\text{H}_4\text{NHC}(t\text{Bu})=\text{N}(2,6\text{-Me}_2\text{C}_6\text{H}_3)$  (**1**).

**Figure 4S.** IR spectrum of  $2\text{-}[\text{Ph}_2\text{P}(\text{O})]\text{C}_6\text{H}_4\text{NHC}(t\text{Bu})=\text{N}(2,6\text{-Me}_2\text{C}_6\text{H}_3)$  (**1**).

**Figure 5S.**  $^1\text{H}$  NMR spectrum of  $\{2\text{-}[\text{Ph}_2\text{P}(\text{O})]\text{C}_6\text{H}_4\text{NC}(t\text{Bu})\text{N}(2,6\text{-Me}_2\text{C}_6\text{H}_3)\}\text{YCl}_2(\text{DME})$  (**2**).

**Figure 6S.**  $^{13}\text{C}$  NMR spectrum of  $\{2\text{-}[\text{Ph}_2\text{P}(\text{O})]\text{C}_6\text{H}_4\text{NC}(t\text{Bu})\text{N}(2,6\text{-Me}_2\text{C}_6\text{H}_3)\}\text{YCl}_2(\text{DME})$  (**2**).

**Figure 7S.**  $^{31}\text{P}$  NMR spectrum of  $\{2\text{-}[\text{Ph}_2\text{P}(\text{O})]\text{C}_6\text{H}_4\text{NC}(t\text{Bu})\text{N}(2,6\text{-Me}_2\text{C}_6\text{H}_3)\}\text{YCl}_2(\text{DME})$  (**2**).

**Figure 8S.** IR spectrum of  $\{2\text{-}[\text{Ph}_2\text{P}(\text{O})]\text{C}_6\text{H}_4\text{NC}(t\text{Bu})\text{N}(2,6\text{-Me}_2\text{C}_6\text{H}_3)\}\text{YCl}_2(\text{DME})$  (**2**).

**Figure 9S.**  $^1\text{H}$  NMR spectrum of  $[2\text{-}(\text{P}(\text{O})\text{Ph}_2)\text{PhNC}(t\text{Bu})(2,6\text{-Me}_2\text{C}_6\text{H}_3)\text{Y}(\text{CH}_2\text{SiMe}_3)_2\text{THF}]$  (**3**).

**Figure 10S.**  $^{13}\text{C}$  NMR spectrum of  $[2\text{-}(\text{P}(\text{O})\text{Ph}_2)\text{PhNC}(t\text{Bu})(2,6\text{-Me}_2\text{C}_6\text{H}_3)\text{Y}(\text{CH}_2\text{SiMe}_3)_2\text{THF}]$  (**3**).

**Figure 11S.**  $^{31}\text{P}$  NMR spectrum of  $[2\text{-}(\text{P}(\text{O})\text{Ph}_2)\text{PhNC}(t\text{Bu})(2,6\text{-Me}_2\text{C}_6\text{H}_3)\text{Y}(\text{CH}_2\text{SiMe}_3)_2\text{THF}]$  (**3**).

**Figure 12S.**  $^1\text{H}$  NMR spectrum of  $[2\text{-}(\text{P}(\text{O})\text{Ph}_2)\text{PhNC}(t\text{Bu})(2,6\text{-Me}_2\text{C}_6\text{H}_3)\text{Lu}(\text{CH}_2\text{SiMe}_3)_2]$  (**5**).

**Figure 13S.**  $^{13}\text{C}$  NMR spectrum of  $[2\text{-}(\text{P}(\text{O})\text{Ph}_2)\text{PhNC}(t\text{Bu})(2,6\text{-Me}_2\text{C}_6\text{H}_3)\text{Lu}(\text{CH}_2\text{SiMe}_3)_2]$  (**5**).

**Figure 14S.**  $^{31}\text{P}$  NMR spectrum of  $[2\text{-}(\text{P}(\text{O})\text{Ph}_2)\text{PhNC}(t\text{Bu})(2,6\text{-Me}_2\text{C}_6\text{H}_3)\text{Lu}(\text{CH}_2\text{SiMe}_3)_2]$  (**5**).

**Table 1S.** Crystallographic data and structure refinement details for **1, 2, 4** and **5**

| Compound                                        | <b>1</b>                                          | <b>2</b>                                                                         | <b>4</b>                                                                         | <b>5</b>                                                              |
|-------------------------------------------------|---------------------------------------------------|----------------------------------------------------------------------------------|----------------------------------------------------------------------------------|-----------------------------------------------------------------------|
| Empirical formula                               | C <sub>31</sub> H <sub>33</sub> N <sub>2</sub> OP | C <sub>37</sub> H <sub>47</sub> Cl <sub>2</sub> N <sub>2</sub> O <sub>4</sub> PY | C <sub>43</sub> H <sub>62</sub> ErN <sub>2</sub> O <sub>2</sub> PSi <sub>2</sub> | C <sub>42.50</sub> H <sub>58</sub> LuN <sub>2</sub> OPSi <sub>2</sub> |
| Formula weight                                  | 480.56                                            | 774.55                                                                           | 893.35                                                                           | 875.03                                                                |
| T [K]                                           | 100(2)                                            | 100(2)                                                                           | 100(2)                                                                           | 100(2)                                                                |
| Wavelength [Å]                                  | 0.71073                                           | 0.71073                                                                          | 0.71073                                                                          | 0.71073                                                               |
| Crystal system                                  | Monoclinic                                        | Tetragonal                                                                       | Monoclinic                                                                       | Triclinic                                                             |
| Space group                                     | P2(1)/c                                           | I-1                                                                              | P2(1)/n                                                                          | P-1                                                                   |
| a [Å]                                           | 14.4270(2)                                        | 26.2291(7)                                                                       | 10.243(1)                                                                        | 11.6576(2)                                                            |
| b [Å]                                           | 18.0000(2)                                        | 26.2291(7)                                                                       | 19.035(2)                                                                        | 11.9319(2)                                                            |
| c [Å]                                           | 10.2803(2)                                        | 10.7386                                                                          | 21.678(3)                                                                        | 18.0960(3)                                                            |
| α [°]                                           | 90                                                | 90                                                                               | 90                                                                               | 74.619(1)                                                             |
| β [°]                                           | 102.366(1)                                        | 90                                                                               | 95.195(2)                                                                        | 72.630(1)                                                             |
| γ [°]                                           | 90                                                | 90                                                                               | 90                                                                               | 63.078(1)                                                             |
| Volume [Å <sup>3</sup> ]                        | 2607.72(6)                                        | 7387.8(4)                                                                        | 4209.1(8)                                                                        | 2116.79(5)                                                            |
| Z                                               | 4                                                 | 8                                                                                | 4                                                                                | 2                                                                     |
| ρ <sub>calcd.</sub> [g cm <sup>-3</sup> ]       | 1.224                                             | 1.393                                                                            | 1.410                                                                            | 1.373                                                                 |
| Absorption coefficient [mm <sup>-1</sup> ]      | 0.132                                             | 1.807                                                                            | 2.126                                                                            | 2.459                                                                 |
| F(000)                                          | 1024                                              | 3224                                                                             | 1844                                                                             | 898                                                                   |
| Crystal size [mm]                               | 0.40×0.20×0.10                                    | 0.37×0.20×0.18                                                                   | 0.23×0.14×0.11                                                                   | 0.50×0.25×0.15                                                        |
| θ range for data collection [°]                 | 3.04 to 28.00                                     | 2.05 to 26.00                                                                    | 2.169 to 26.00                                                                   | 2.83 to 27.00                                                         |
| Index ranges                                    | -19≤h≤19,<br>-23≤k≤23,<br>-13≤l≤13                | -32≤h≤32,<br>-31≤k≤32,<br>-13≤l≤13                                               | -12≤h≤12,<br>-23≤k≤23,<br>-26≤l≤26                                               | -14≤h≤14,<br>15≤k≤15,<br>-23≤l≤23                                     |
| Reflections collected                           | 45921                                             | 31590                                                                            | 38140                                                                            | 34254                                                                 |
| Independent reflections                         | 6265                                              | 7213                                                                             | 8254                                                                             | 9179                                                                  |
| R <sub>int</sub>                                | 0.0536                                            | 0.0490                                                                           | 0.0380                                                                           | 0.0406                                                                |
| Completeness to θ [%]                           | 99.6                                              | 99.6                                                                             | 99.5                                                                             | 99.4                                                                  |
| Data/restraints/parameters                      | 6265/0/325                                        | 7213/21/432                                                                      | 8254/0/471                                                                       | 9179/0/490                                                            |
| Goodness-of-fit on F <sup>2</sup>               | 1.036                                             | 1.001                                                                            | 1.066                                                                            | 1.037                                                                 |
| Final R indices [I>2σ(I)]                       | R1 = 0.0383,<br>wR2 = 0.0961                      | R1 = 0.0355,<br>wR2 = 0.0788                                                     | R1 = 0.0309,<br>wR2 = 0.0818                                                     | R1 = 0.0243,<br>wR2 = 0.0504                                          |
| R indices (all data)                            | R1 = 0.0509,<br>wR2 = 0.1021                      | R1 = 0.0458,<br>wR2 = 0.0818                                                     | R1 = 0.0367,<br>wR2 = 0.0851                                                     | R1 = 0.0297,<br>wR2 = 0.0516                                          |
| Largest diff. peak and hole [eÅ <sup>-3</sup> ] | 0.554/-0.260                                      | 1.157/-0.507                                                                     | 1.927/-0.702                                                                     | 1.136/-0.604                                                          |

**Table 2S.** Catalytic tests in isoprene polymerization initiated by systems (**3-5**)/borate/ $\text{AlMe}_3$  (borate:  $[\text{Et}_3\text{NH}][\text{BPh}_4]$ ,  $\text{B}(\text{C}_6\text{F}_5)_3$ ,  $[\text{Ph}_3\text{C}][\text{B}(\text{C}_6\text{F}_5)_4]$ ,  $[\text{PhNHMe}_2][\text{B}(\text{C}_6\text{F}_5)_4]$ ,  $[\text{Ln}]/[\text{borate}]/[\text{AlMe}_3]=1:1:10$ ).

|    | comp. | borate                             | [IP]/[Ln] | t, h | Yield, % | Cis-1,4 | Trans-1,4 | 3,4- | $M_n(\times 10^{-3})^a$ | $M_n(\times 10^{-3})_{\text{calc}}^b$ | $M_w/M_n$ |
|----|-------|------------------------------------|-----------|------|----------|---------|-----------|------|-------------------------|---------------------------------------|-----------|
| 1  | 3     | $\text{Et}_3\text{NB}$             | 1000      | 24   | 0        | -       | -         | -    | -                       | 65.0                                  | -         |
| 2  | 3     | $\text{B}(\text{C}_6\text{F}_5)_3$ | 1000      | 24   | 0        | -       | -         | -    | -                       | 65.0                                  | -         |
| 3  | 3     | HNB                                | 1000      | 24   | 0        | -       | -         | -    | -                       | 65.0                                  | -         |
| 4  | 3     | TB                                 | 1000      | 24   | 0        | -       | -         | -    | -                       | 65.0                                  | -         |
| 5  | 4     | $\text{Et}_3\text{NB}$             | 1000      | 24   | 0        | -       | -         | -    | -                       | 65.0                                  | -         |
| 6  | 4     | $\text{B}(\text{C}_6\text{F}_5)_3$ | 1000      | 24   | 0        | -       | -         | -    | -                       | 65.0                                  | -         |
| 7  | 4     | HNB                                | 1000      | 24   | 0        | -       | -         | -    | -                       | 65.0                                  | -         |
| 8  | 4     | TB                                 | 1000      | 24   | 0        | -       | -         | -    | -                       | 65.0                                  | -         |
| 9  | 5     | $\text{Et}_3\text{NB}$             | 1000      | 24   | 0        | -       | -         | -    | -                       | 65.0                                  | -         |
| 10 | 5     | $\text{B}(\text{C}_6\text{F}_5)_3$ | 1000      | 24   | 0        | -       | -         | -    | -                       | 65.0                                  | -         |
| 11 | 5     | HNB                                | 1000      | 24   | 0        | -       | -         | -    | -                       | 65.0                                  | -         |
| 12 | 5     | TB                                 | 1000      | 24   | 0        | -       | -         | -    | -                       | 65.0                                  | -         |
| 13 | 3     | -                                  | 1000      | 24   | 0        | -       | -         | -    | -                       | 65.0                                  | -         |
| 14 | 4     | -                                  | 1000      | 24   | 0        | -       | -         | -    | -                       | 65.0                                  | -         |
| 15 | 5     | -                                  | 1000      | 24   | 0        | -       | -         | -    | -                       | 65.0                                  | -         |

Conditions: complex (10  $\mu\text{mol}$  in toluene,  $[\text{AlMe}_3]:[\text{Ln}]:[\text{borate}] = 10/1/1$ , T: 25  $^\circ\text{C}$ .); HNB =  $[\text{PhNHMe}_2][\text{B}(\text{C}_6\text{F}_5)_4]$ , TB =  $[\text{Ph}_3\text{C}][\text{B}(\text{C}_6\text{F}_5)_4]$ ,  $\text{Et}_3\text{NB} = [\text{Et}_3\text{NH}][\text{BPh}_4]$ ; a) Determined by GPC against polystyrene standard; \*The catalytic tests were performed without the addition of borate; b)  $M_{\text{calc}} = ([\text{IP}]/[\text{Ln}]) \times 68.12 \times (\text{conversion})$ .

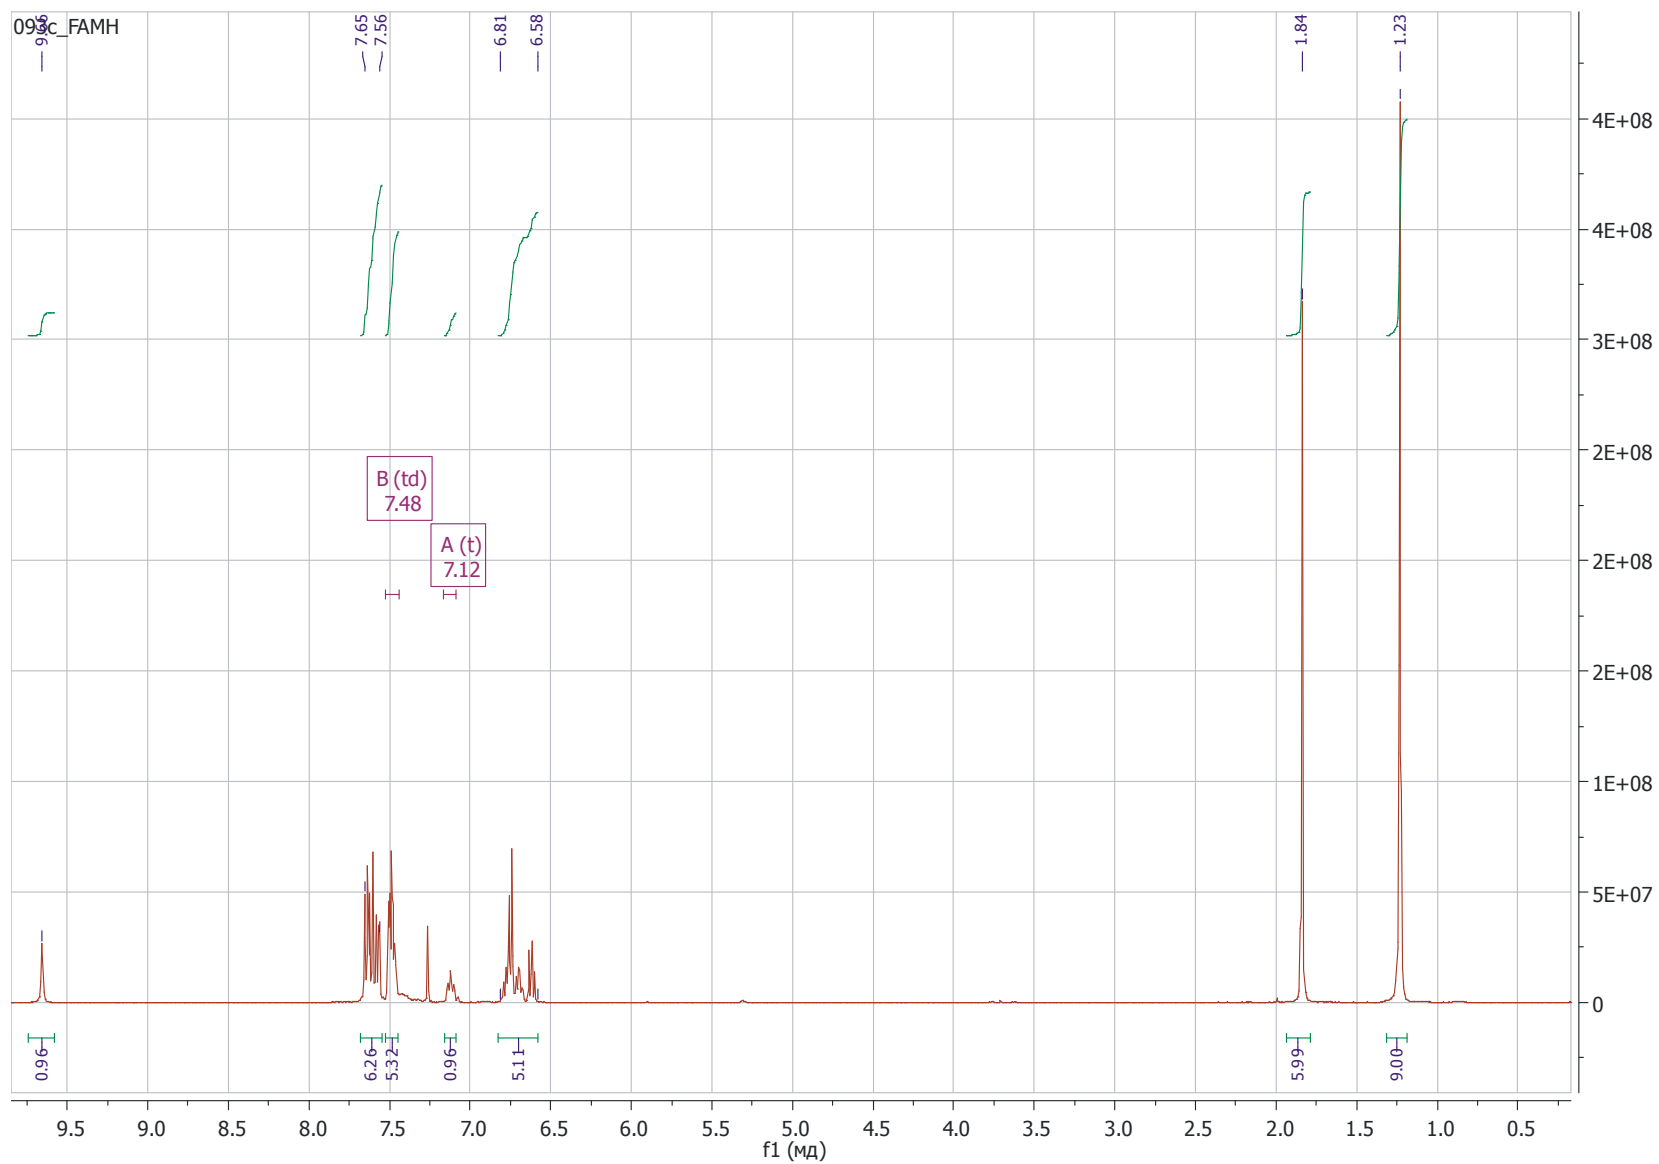

**Figure 1S.**  $^1\text{H}$  NMR spectrum (400 MHz,  $\text{CDCl}_3$ , 298 K) of 2-[ $\text{Ph}_2\text{P}(\text{O})\text{C}_6\text{H}_4\text{NHC}(t\text{Bu})=\text{N}(2,6\text{-Me}_2\text{C}_6\text{H}_3)$ ] (1).

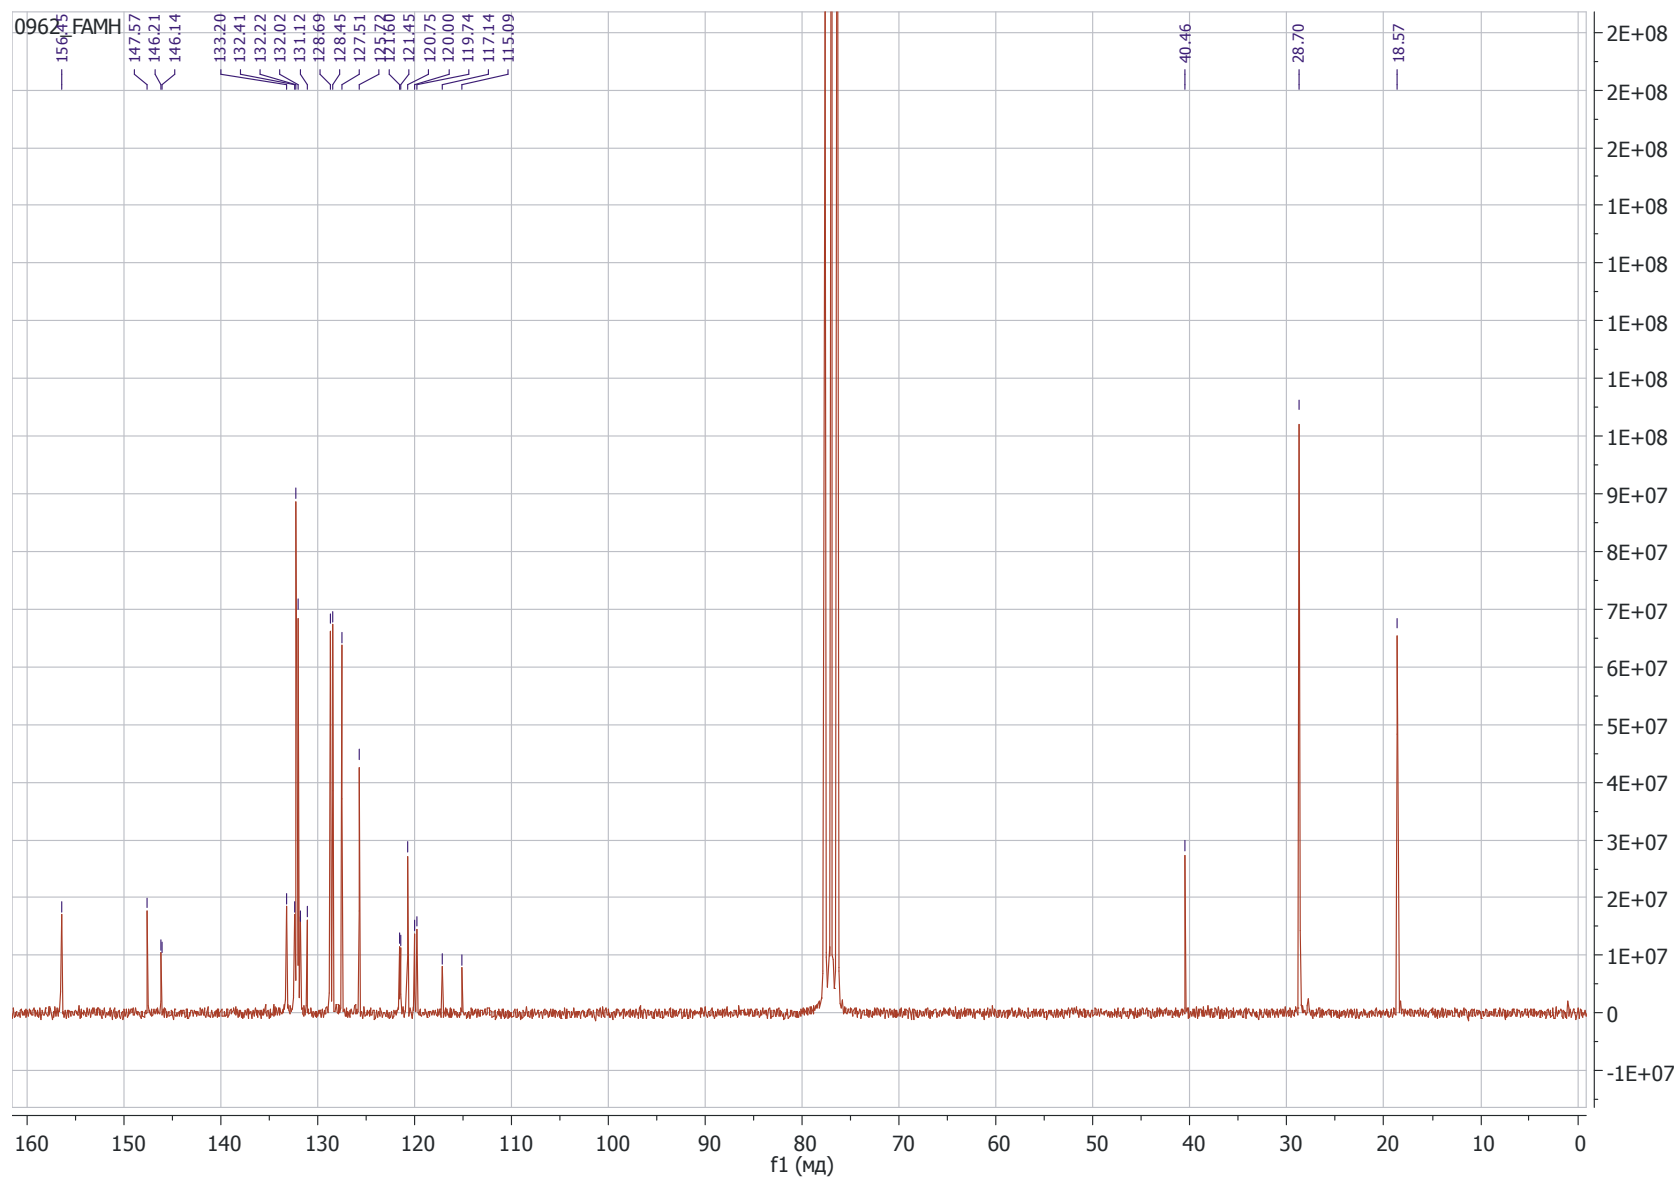

**Figure 2S.**  $^{13}\text{C}$  NMR spectrum (50 MHz,  $\text{CDCl}_3$ , 298 K) of 2-[ $\text{Ph}_2\text{P}(\text{O})$ ] $\text{C}_6\text{H}_4\text{NHC}(\text{tBu})=\text{N}(2,6\text{-Me}_2\text{C}_6\text{H}_3)$  (**1**).

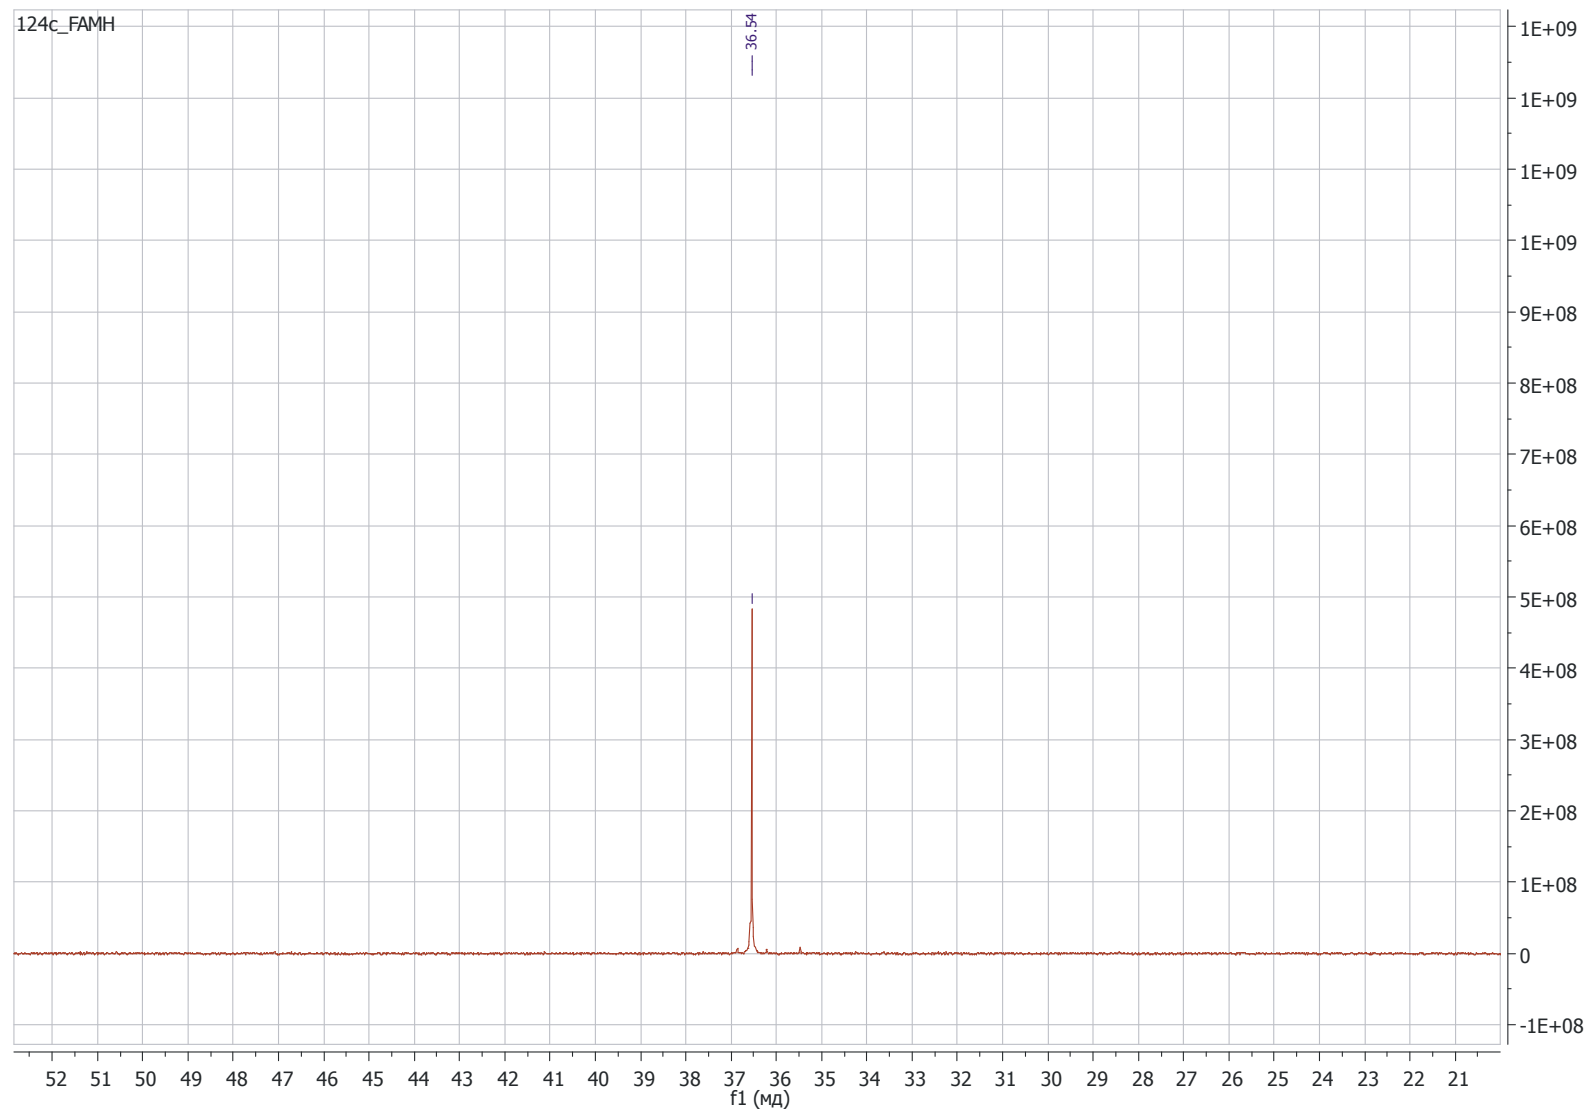

**Figure 3S.**  $^{31}\text{P}$  NMR spectrum (81 MHz,  $\text{CDCl}_3$ , 298 K) of 2-[ $\text{Ph}_2\text{P}(\text{O})$ ] $\text{C}_6\text{H}_4\text{NHC}(t\text{Bu})=\text{N}(2,6\text{-Me}_2\text{C}_6\text{H}_3)$  (**1**).

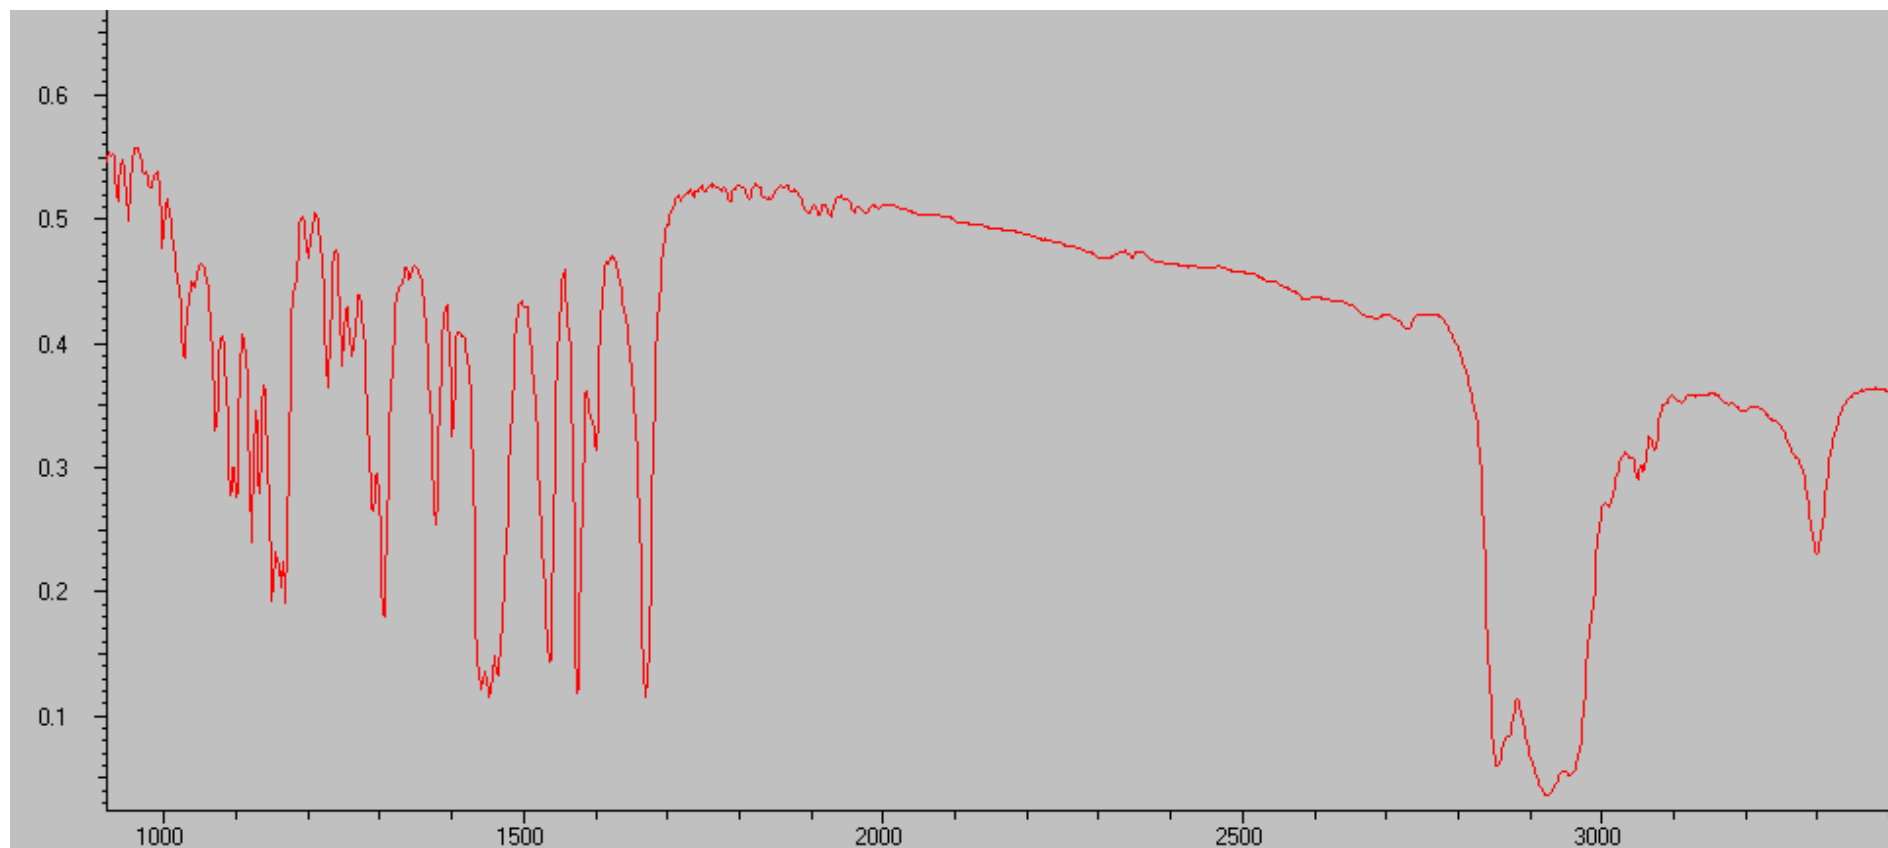

**Figure 4S.** IR spectrum of 2-[Ph<sub>2</sub>P(O)]C<sub>6</sub>H<sub>4</sub>NHC(*t*Bu)=N(2,6-Me<sub>2</sub>C<sub>6</sub>H<sub>3</sub>) (**1**).



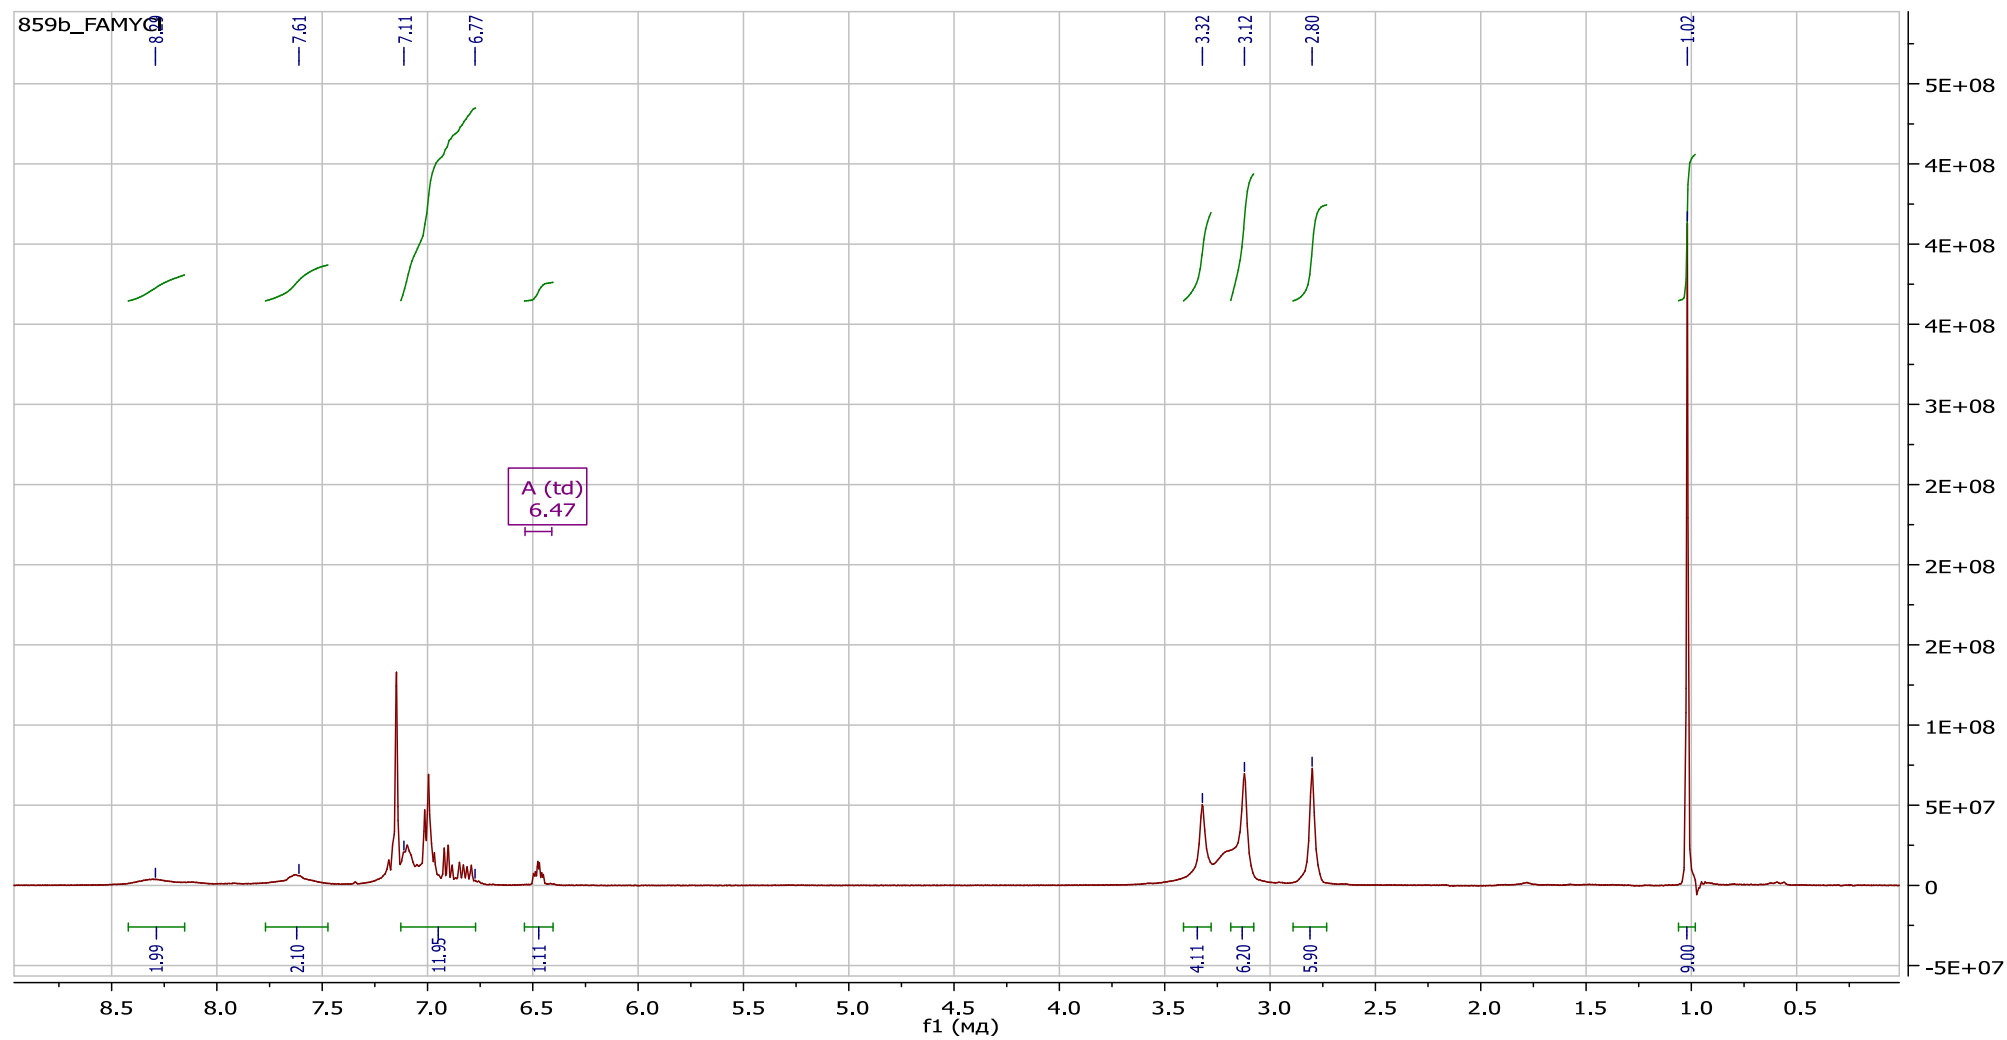

**Figure 5S.**  $^1\text{H}$  NMR spectrum (400 MHz,  $\text{C}_6\text{D}_6$ , 298 K) of  $\{2\text{-}[\text{Ph}_2\text{P}(\text{O})]\text{C}_6\text{H}_4\text{NC}(t\text{Bu})\text{N}(2,6\text{-Me}_2\text{C}_6\text{H}_3)\}\text{YCl}_2(\text{DME})$  (**2**).

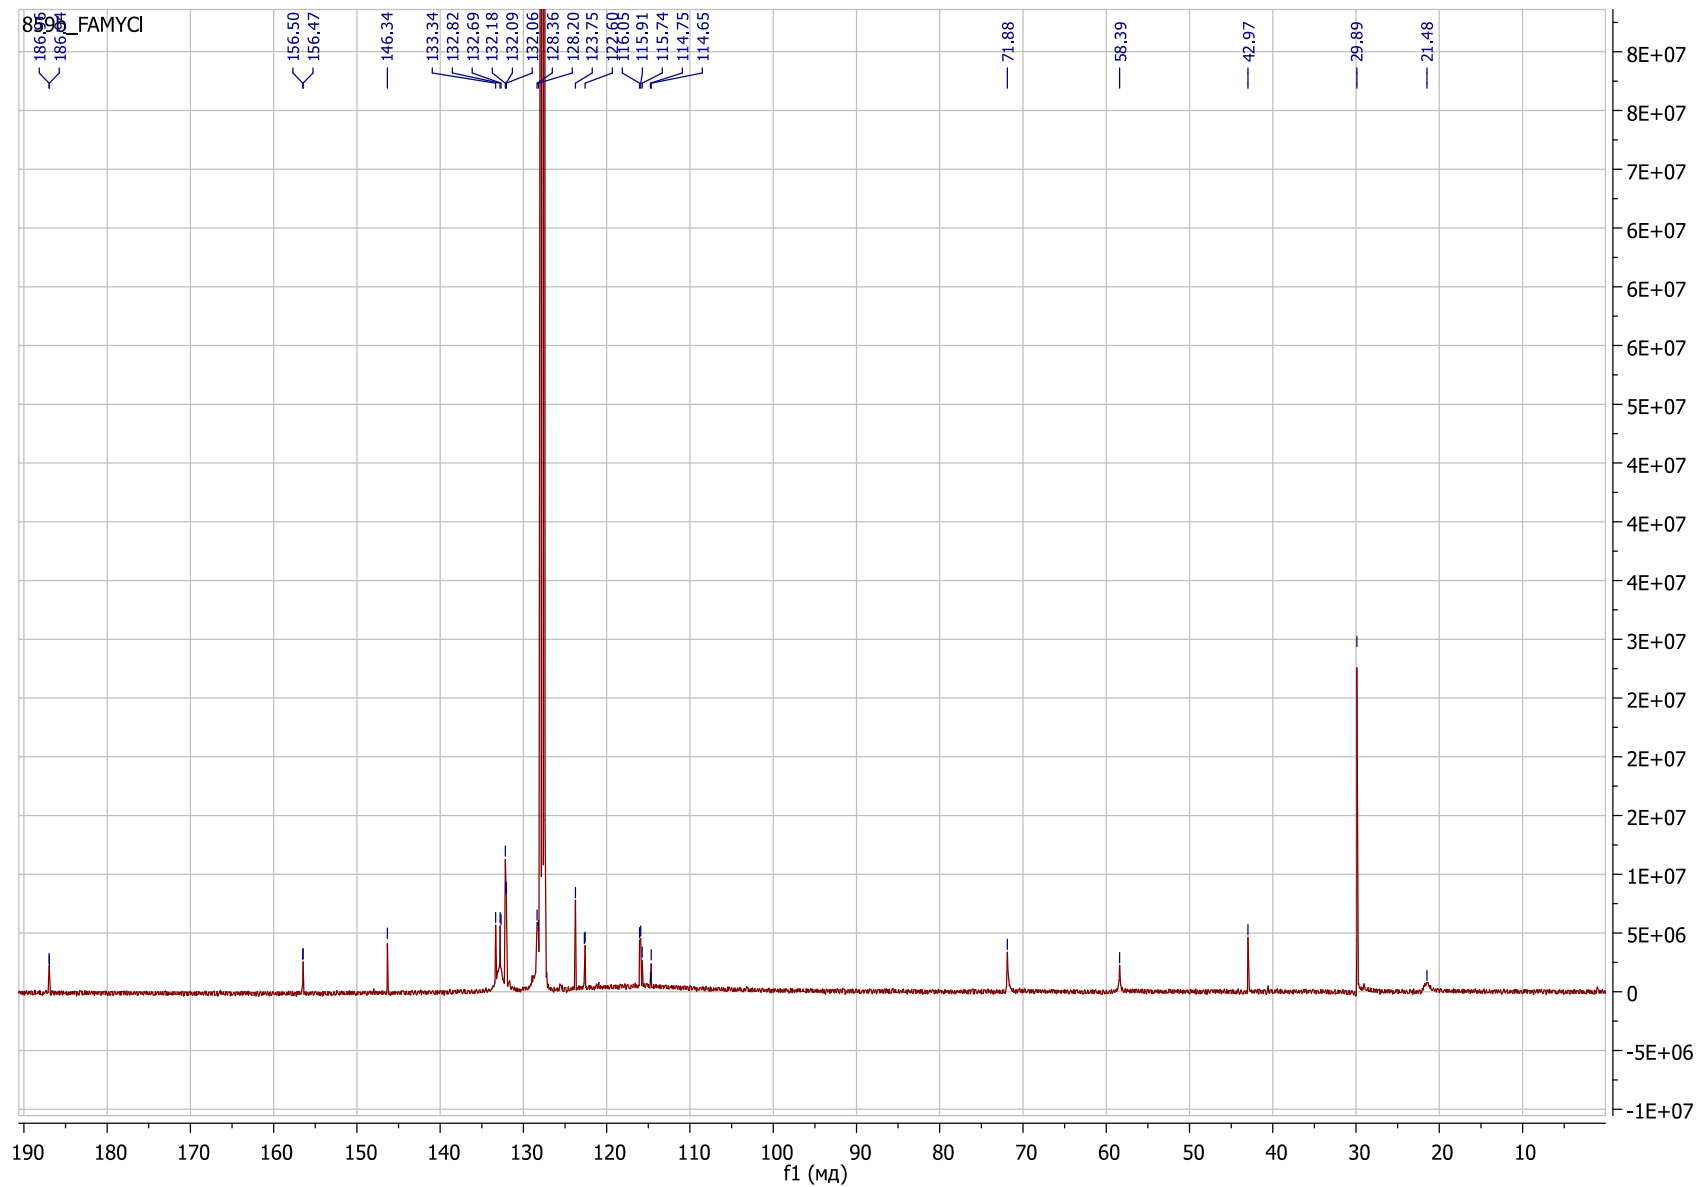

**Figure 6S.**  $^{13}\text{C}$  NMR spectrum(100 MHz,  $\text{C}_6\text{D}_6$ , 298 K) of  $\{2\text{-}[\text{Ph}_2\text{P}(\text{O})]\text{C}_6\text{H}_4\text{NC}(t\text{Bu})\text{N}(2,6\text{-Me}_2\text{C}_6\text{H}_3)\} \text{YCl}_2(\text{DME})$  (**2**).

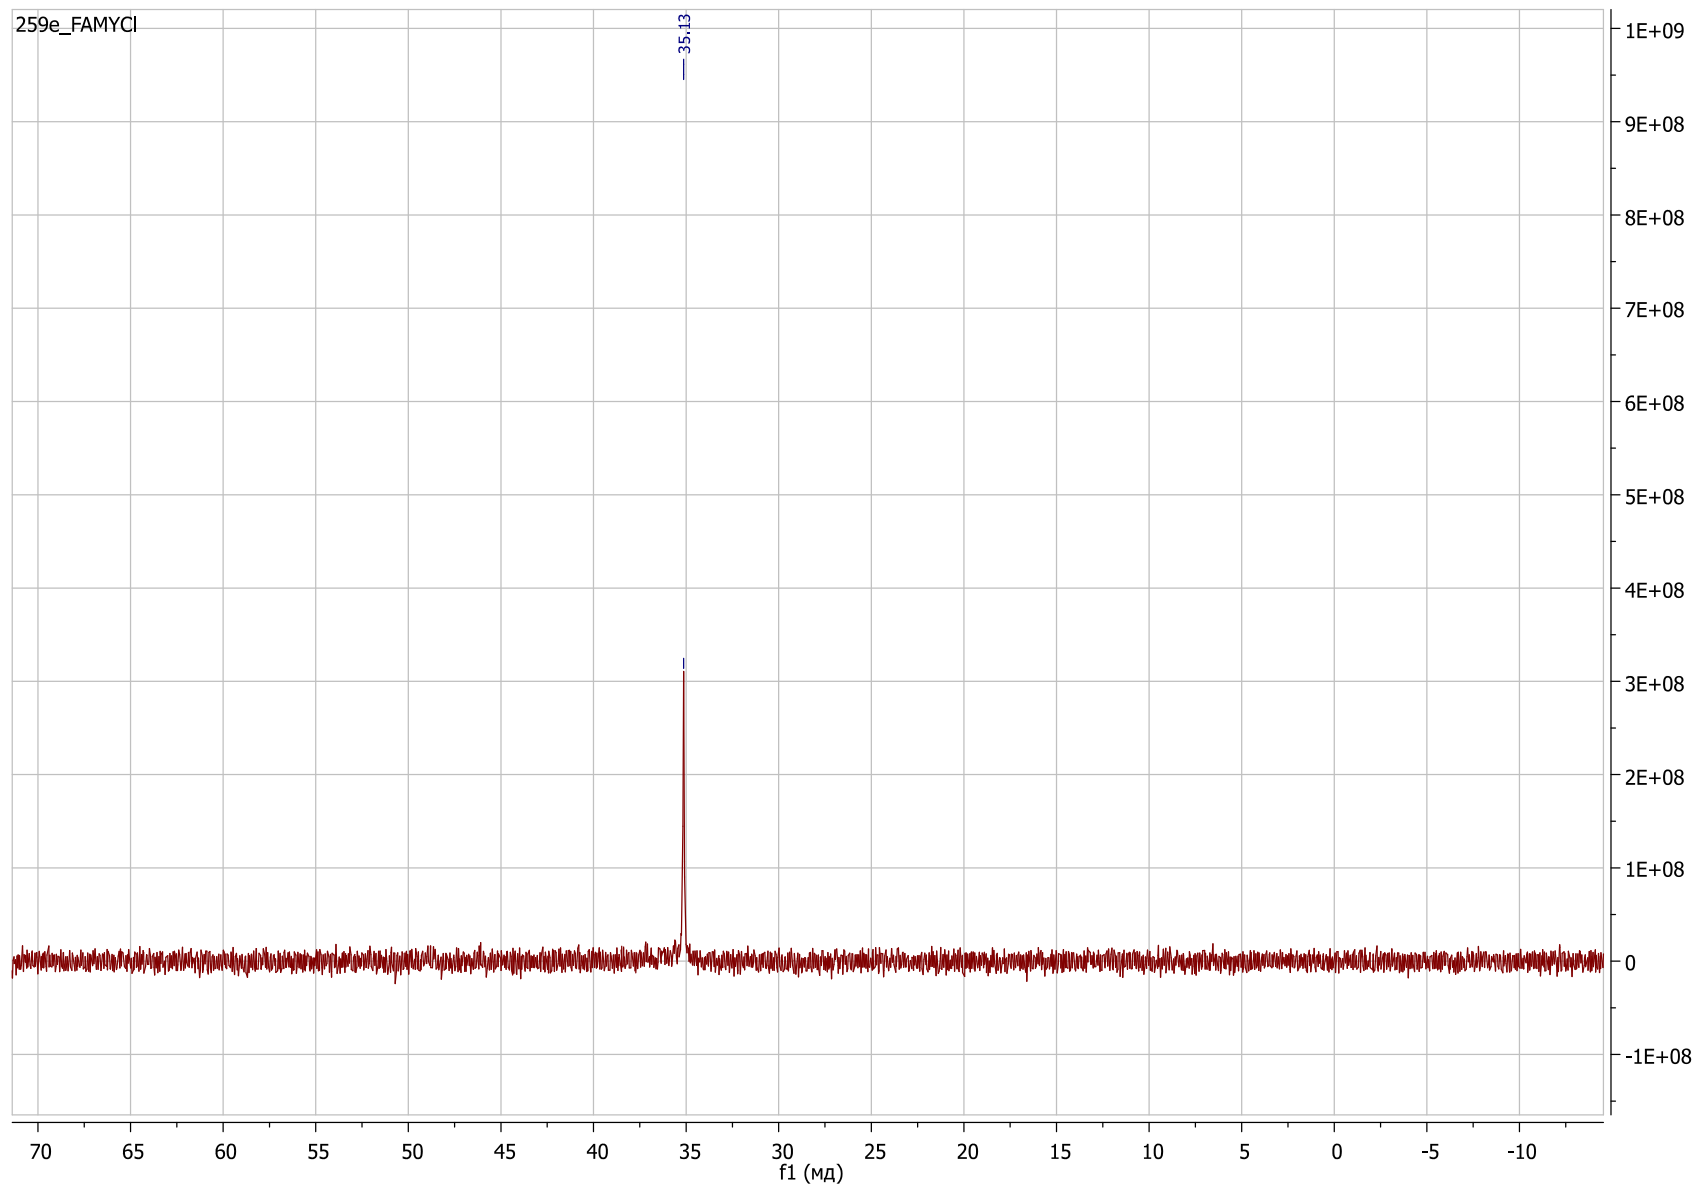

**Figure 7S.**  $^{31}\text{P}$  NMR spectrum (81 MHz,  $\text{C}_6\text{D}_6$ , 298 K) of  $\{2\text{-}[\text{Ph}_2\text{P}(\text{O})\text{C}_6\text{H}_4\text{NC}(t\text{Bu})\text{N}(2,6\text{-Me}_2\text{C}_6\text{H}_3)]\text{YCl}_2(\text{DME})\}$  (**2**).

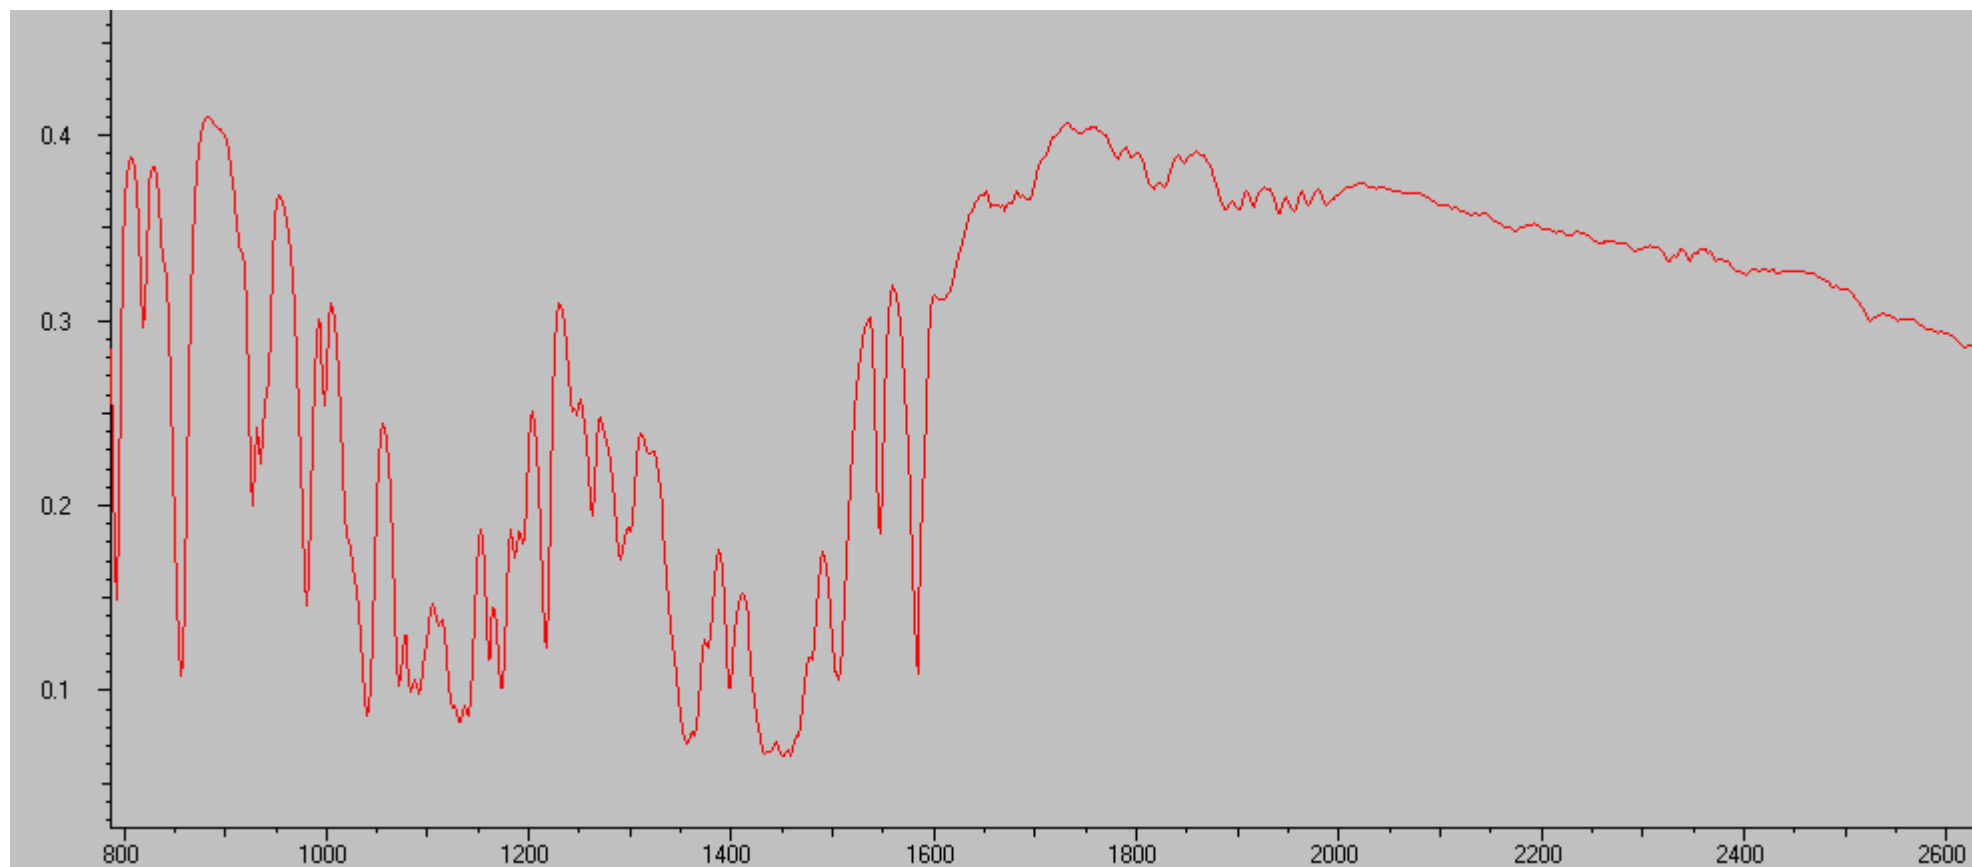

**Figure 8S.** IR spectrum of {2-[Ph<sub>2</sub>P(O)]C<sub>6</sub>H<sub>4</sub>NC(*t*Bu)N(2,6-Me<sub>2</sub>C<sub>6</sub>H<sub>3</sub>)}YCl<sub>2</sub>(DME) (**2**).

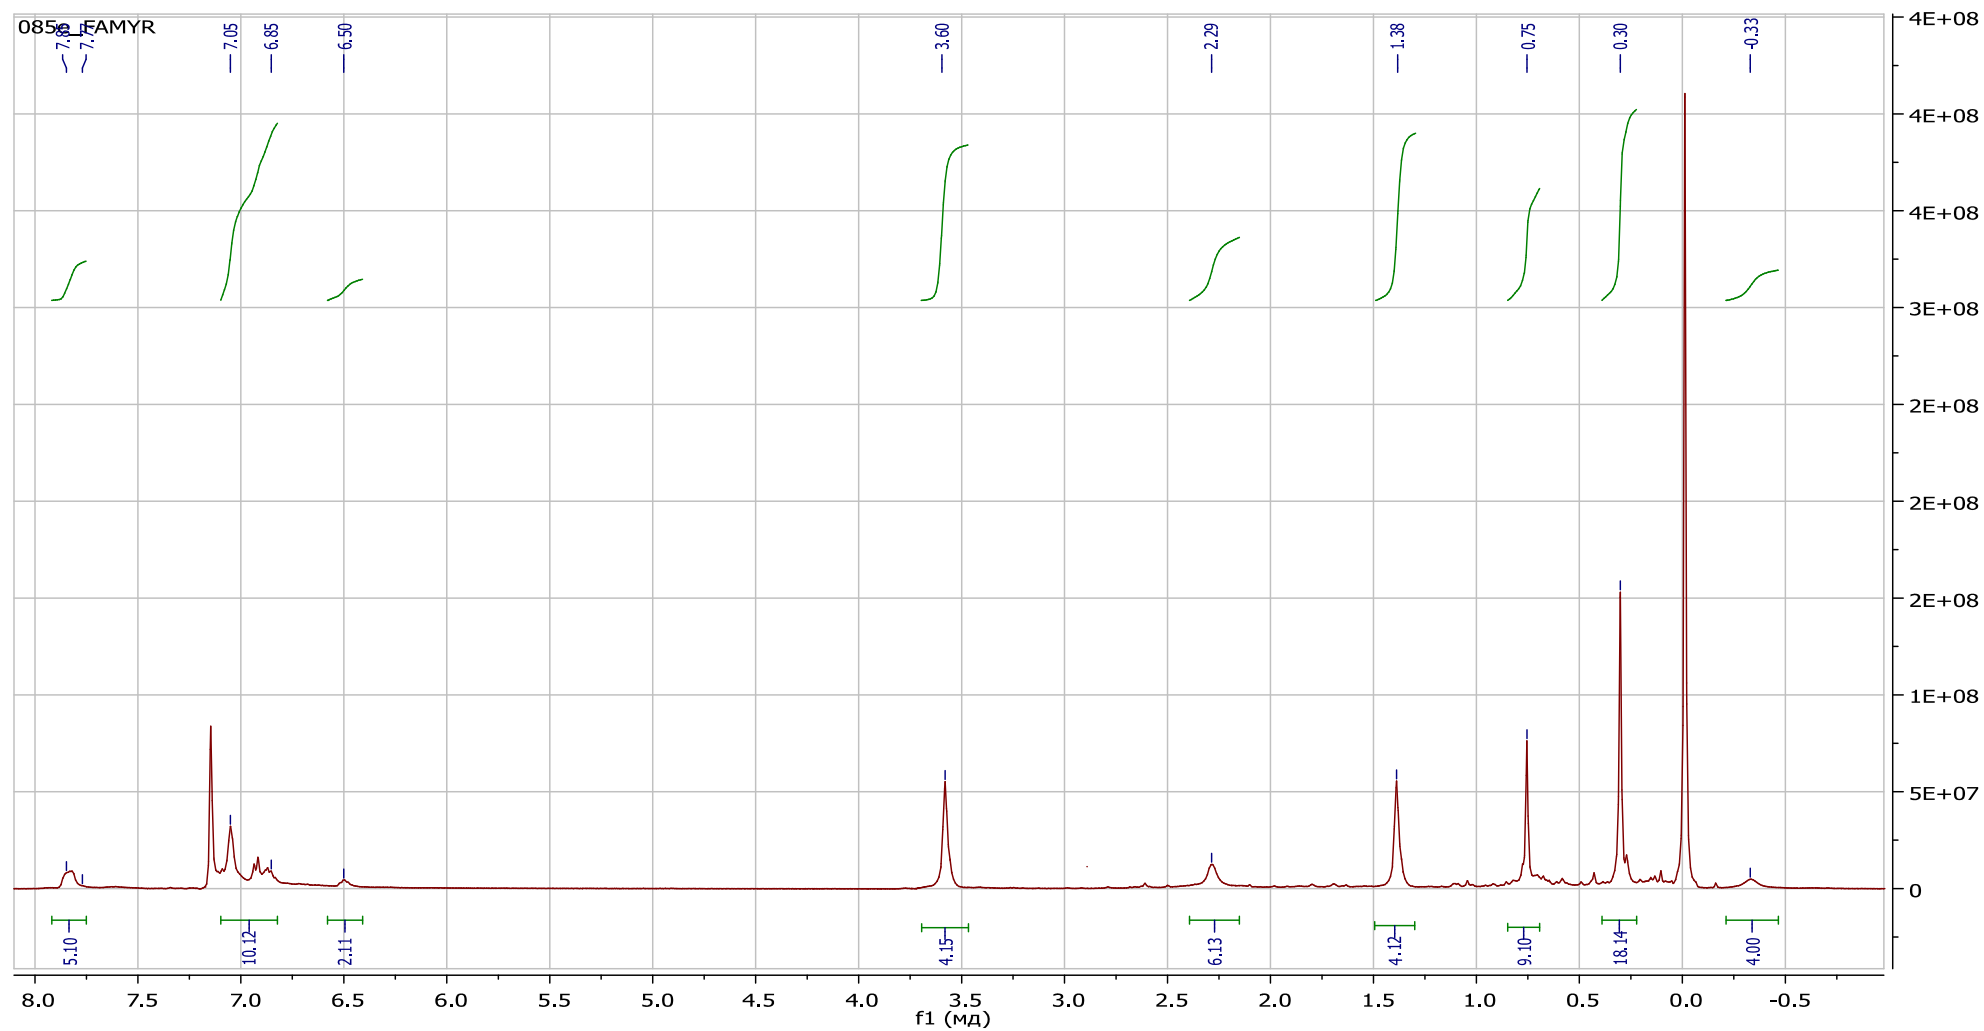

**Figure 9S.**  $^1\text{H}$  NMR spectrum (400 MHz,  $\text{C}_6\text{D}_6$ , 298 K) of  $[2\text{-}(\text{P}(\text{O})\text{Ph}_2)\text{PhNC}(t\text{Bu})(2,6\text{-Me}_2\text{C}_6\text{H}_3)\text{Y}(\text{CH}_2\text{SiMe}_3)_2\text{THF}]$  (**3**).

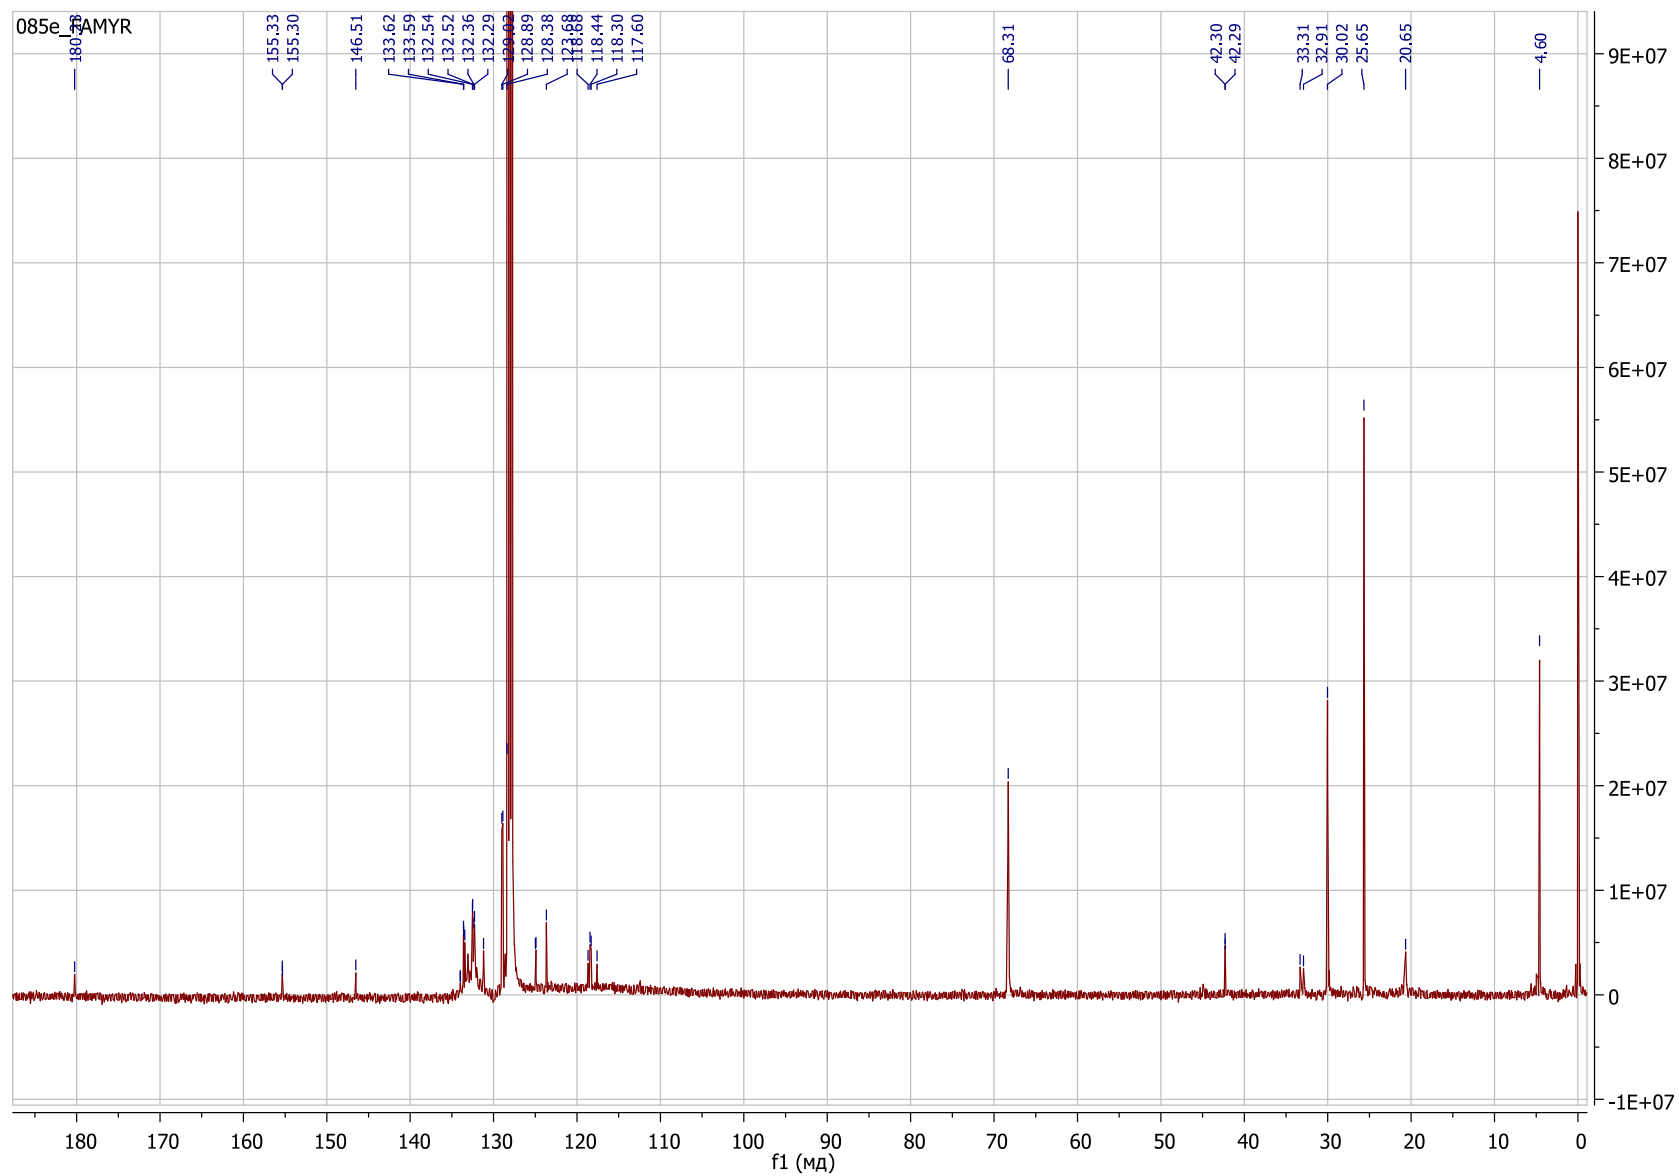

**Figure 10S.**  $^{13}\text{C}$  NMR spectrum (100 MHz,  $\text{C}_6\text{D}_6$ , 298 K) of  $[2\text{-}(\text{P}(\text{O})\text{Ph}_2)\text{PhNC}(t\text{Bu})(2,6\text{-Me}_2\text{C}_6\text{H}_3)\text{Y}(\text{CH}_2\text{SiMe}_3)_2\text{THF}]$  (**3**).

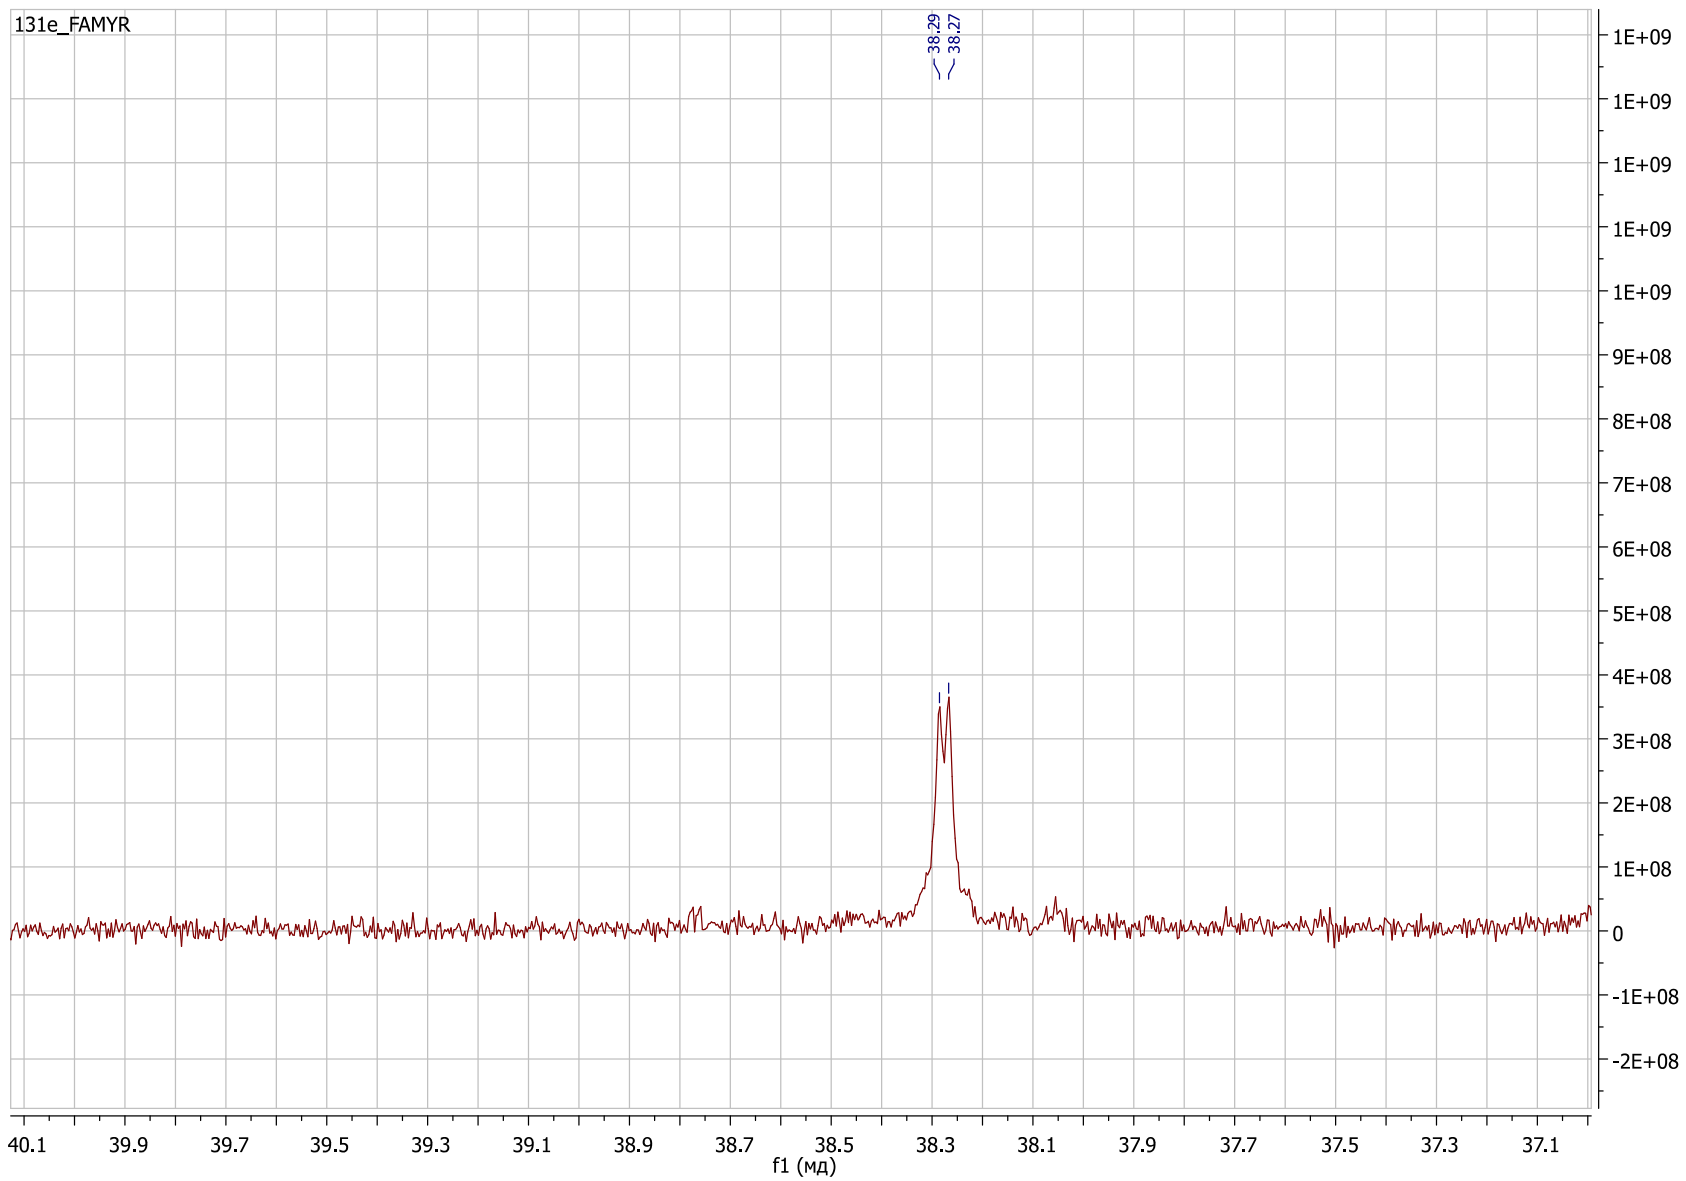

**Figure 11S.**  $^{31}\text{P}$  NMR spectrum (81 MHz,  $\text{C}_6\text{D}_6$ , 298 K) of [2-(P(O)Ph<sub>2</sub>)PhNC(*t*Bu)(2,6-Me<sub>2</sub>C<sub>6</sub>H<sub>3</sub>)Y(CH<sub>2</sub>SiMe<sub>3</sub>)<sub>2</sub>THF] (**3**).

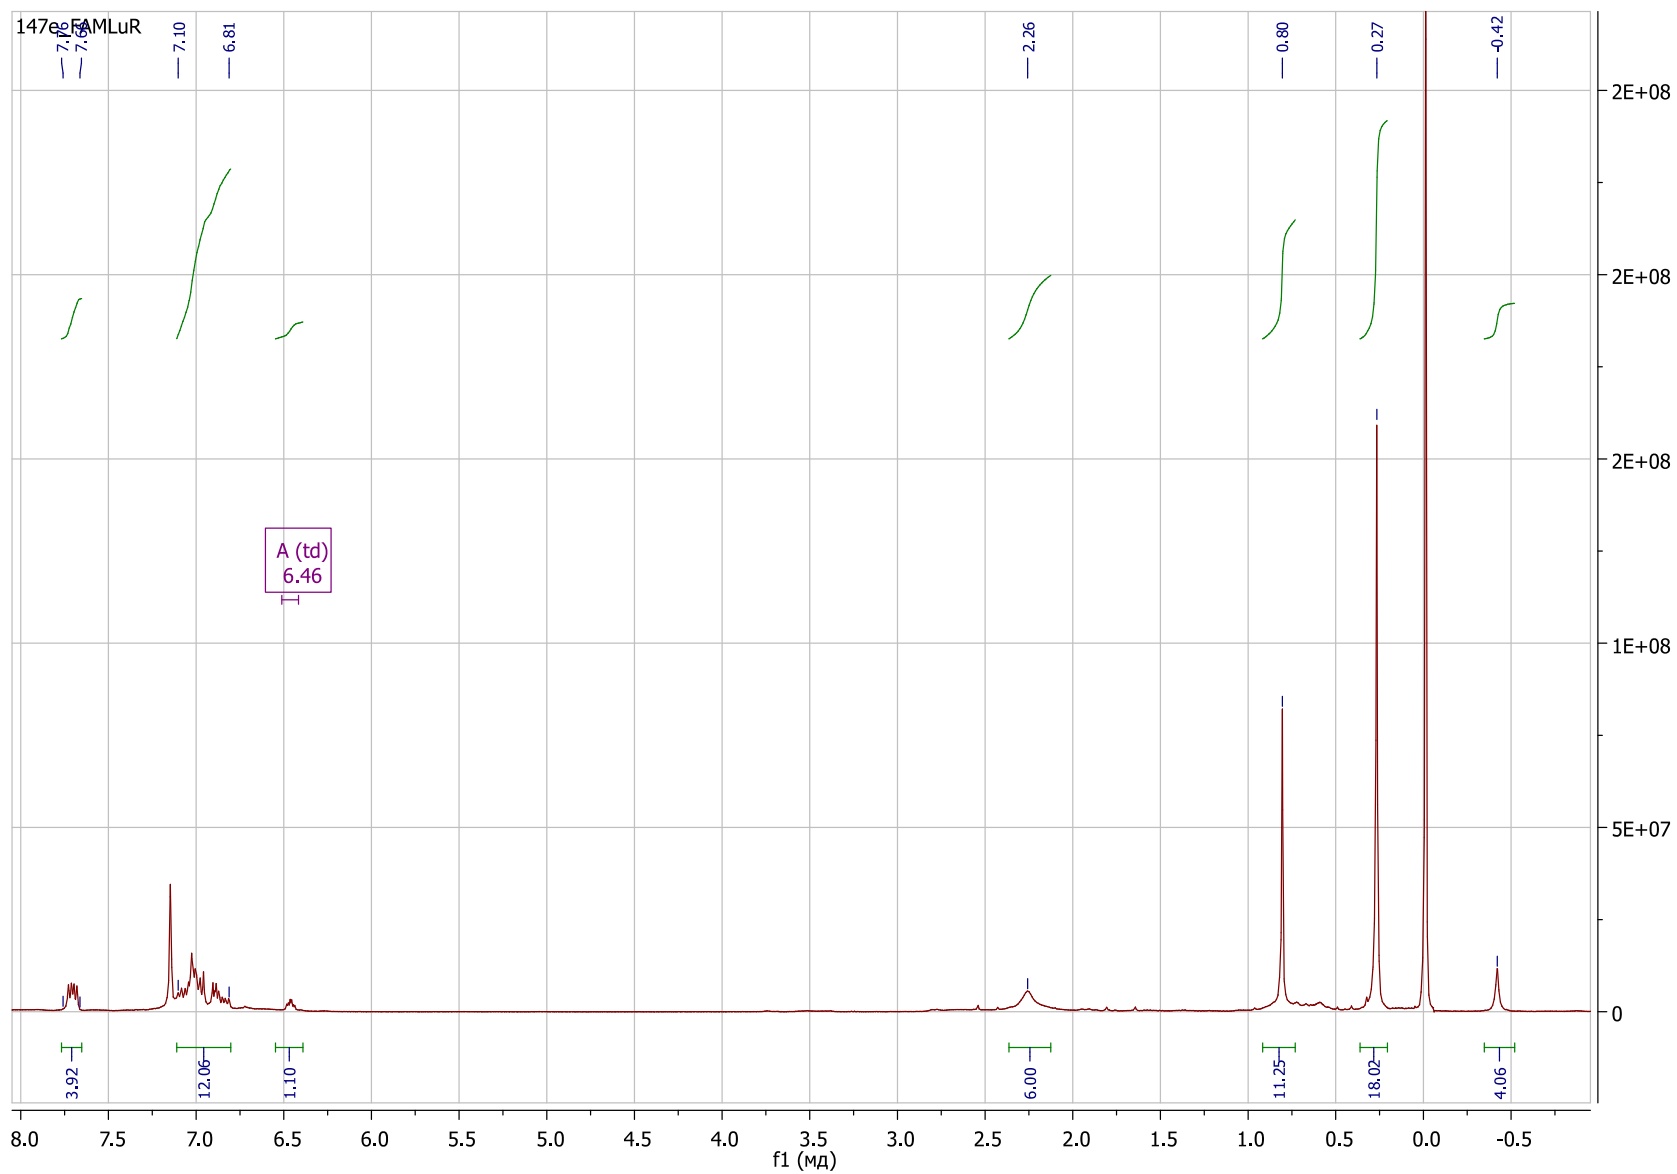

**Figure 12S.**  $^1\text{H}$  NMR spectrum of (400 MHz,  $\text{C}_6\text{D}_6$ , 298 K)  $[2\text{-}(\text{P}(\text{O})\text{Ph}_2)\text{PhNC}(t\text{Bu})(2,6\text{-Me}_2\text{C}_6\text{H}_3)\text{Lu}(\text{CH}_2\text{SiMe}_3)_2]$  (**5**).



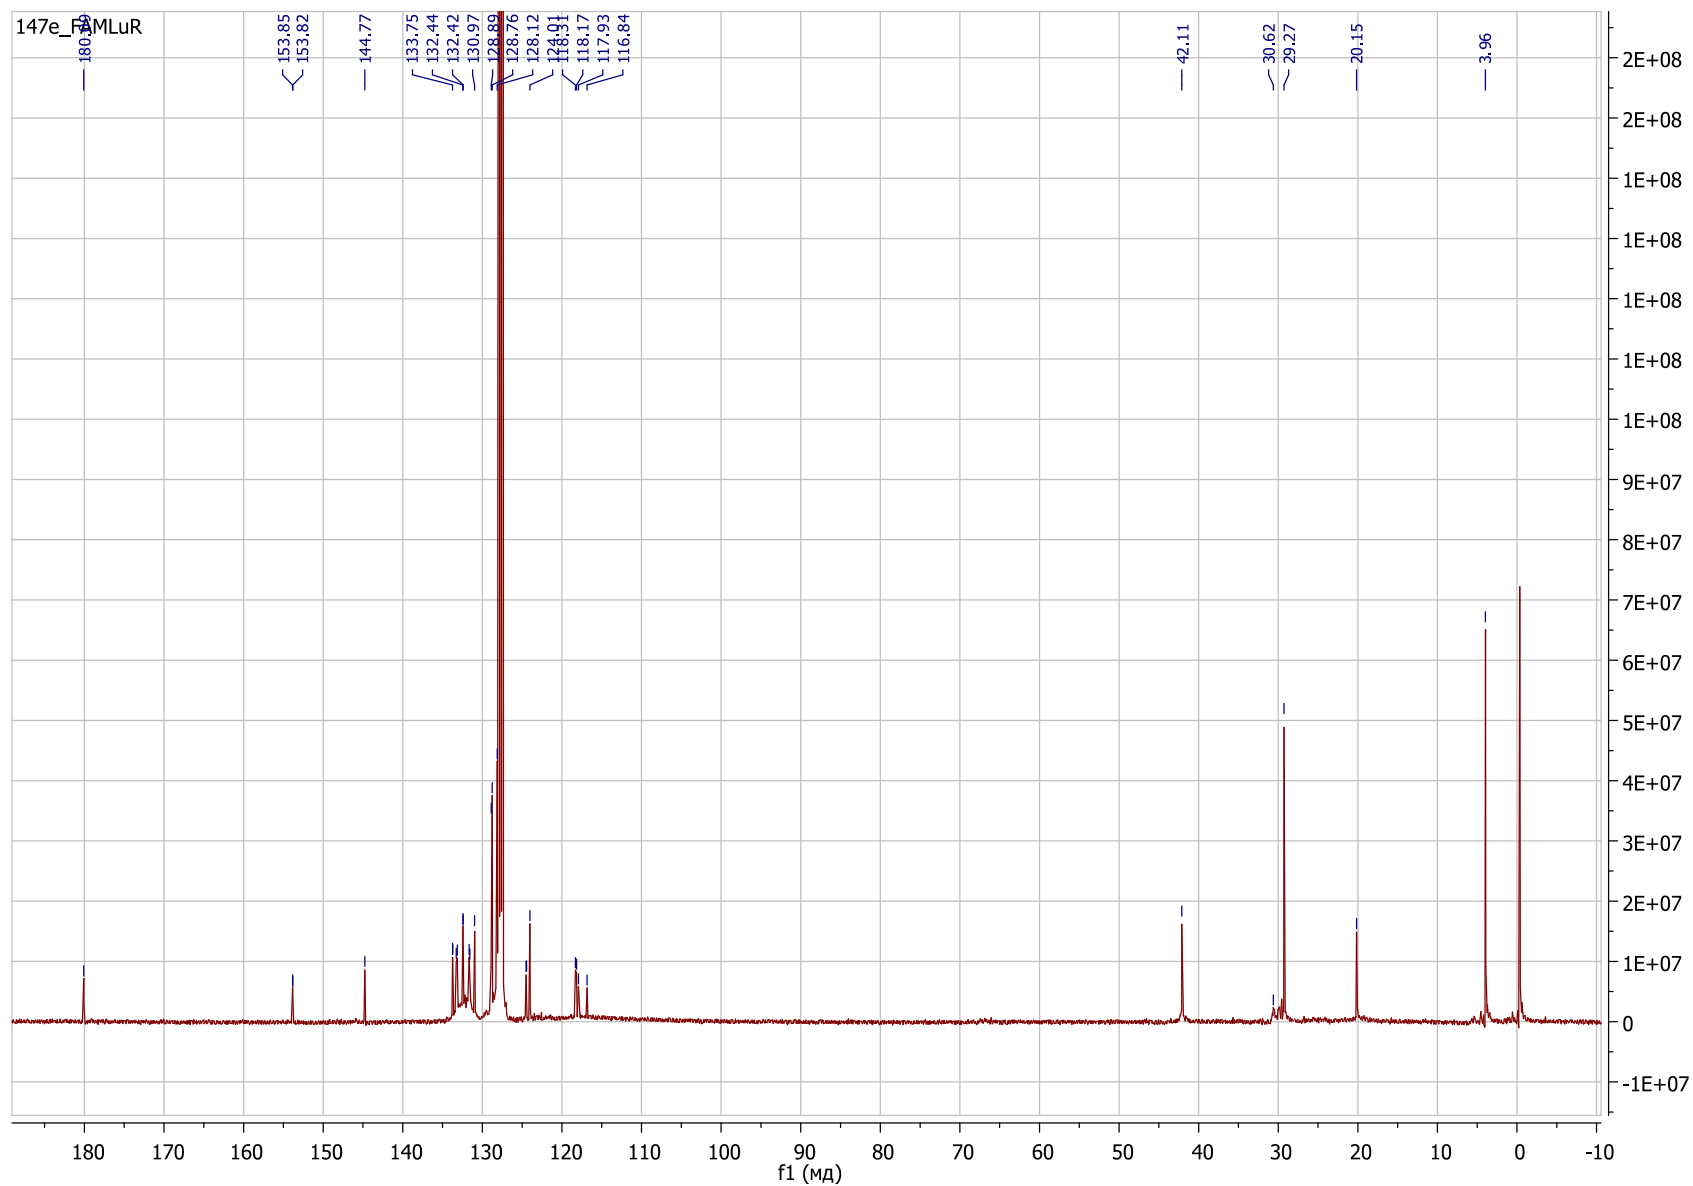

**Figure 13S.**  $^{13}\text{C}$  NMR spectrum (100 MHz,  $\text{C}_6\text{D}_6$ , 298 K) of  $[2\text{-}(\text{P}(\text{O})\text{Ph}_2)\text{PhNC}(t\text{Bu})(2,6\text{-Me}_2\text{C}_6\text{H}_3)\text{Lu}(\text{CH}_2\text{SiMe}_3)_2]$  (**5**).

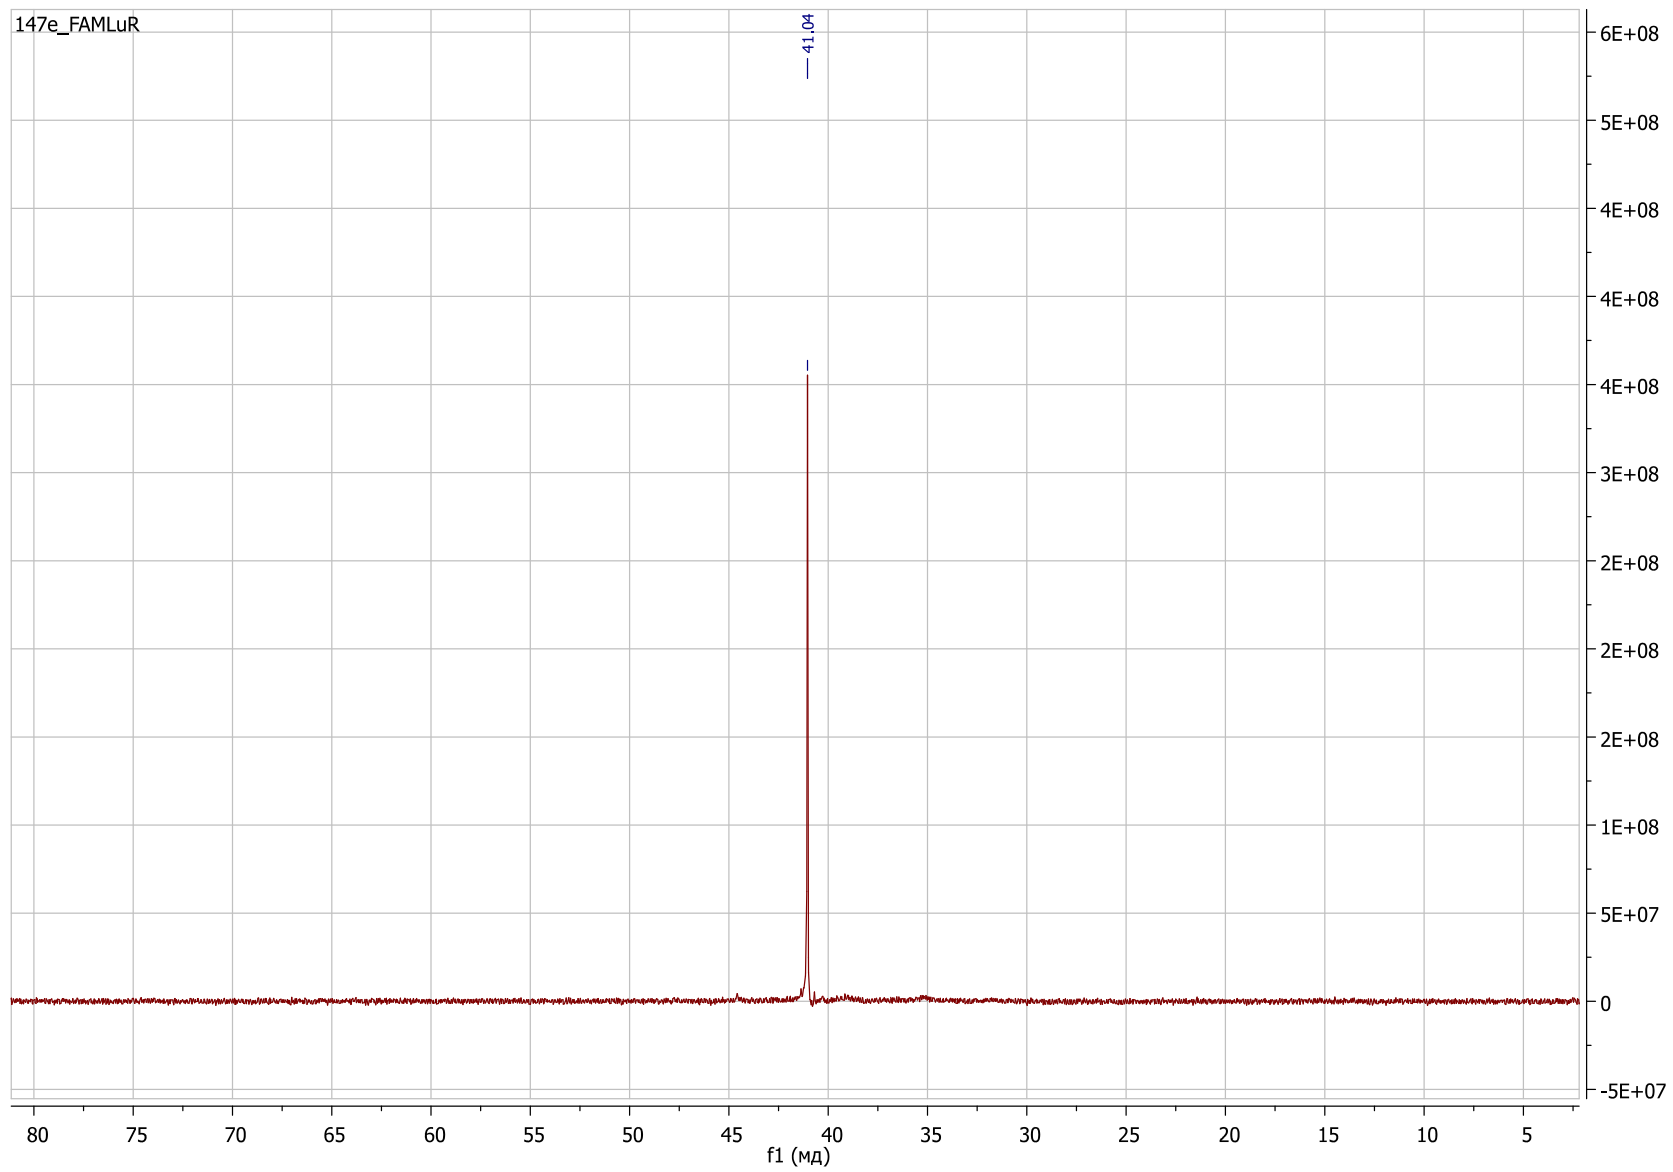

**Figure 14S.**  $^{31}\text{P}$  NMR spectrum (81 MHz,  $\text{C}_6\text{D}_6$ , 298 K) of  $[\text{2-(P(O)Ph}_2\text{)PhNC}(t\text{Bu})(2,6\text{-Me}_2\text{C}_6\text{H}_3)\text{Lu}(\text{CH}_2\text{SiMe}_3)_2]$  (**5**).
